# Supplementary material for: GOCI Yonsei aerosol retrieval version 2 aerosol products: improved algorithm description and error analysis with uncertainty estimation from 5-year validation over East Asia
Source: Copernicus journal article supplement (doi:10.5194/amt-2017-251), 2017-08-07
Supplement: Supplementary file [file amt-2017-251-AC4-supplement.pdf]

1 Referee: #1

2 We appreciate the reviewer's insights and helpful comments/suggestions, which helped  
3 improve the scientific quality of our manuscript. Basically, we reflected all the comments and  
4 suggestions. And, new references were added in revised manuscript.

5

6 1. General comments

7 This manuscript updates the Yonsei aerosol retrieval (YAER) version 1 to version 2 to  
8 overcome the errors related to uncertainties in surface reflectance and simple cloud masking  
9 and the current version is capable of near-real-time processing. The updated version has been  
10 compared to previous version and validated using multiple observations, including MODIS,  
11 VIIRS, AERONET and SONET data. This upgration is meaningful and will also be useful to  
12 improve model predicitions through data assimilation because it has lower error and is capable  
13 of NRT processing. This manuscript is well organized and wrtiten. I would strongly  
14 recomend publication after some minor corrections.

15

16 2. Detailed comments

17 - Line 9: a role of to "the role of "

18 Ans.) A following sentence were revised in p.2/1.8–9 of revised manuscript:

19 "Thus, accurate AOP retrievals are important for quantifying the role of aerosols in climate  
20 change."

21  
22  
23  
24  
25  
26  
27  
28  
29  
30  
31  
32  
33  
34  
35  
36  
37  
38  
39  
40  
41

Line 12: sulfates nitrates to "sulfate nitrate"

Ans.) Following other reviewer's comment, a part of discussion about PM was shortened and that word was removed.

- Line 11: delete "The"

Ans.) The word was removed and a following sentence was revised in p.2/1.9–11 of revised manuscript:

“With respect to air pollution, ambient fine particulate matter (PM) affects respiratory and pulmonary systems, resulting in an increased incidence of heart disease, stroke, and lung cancer (Lim et al., 2012).”

- Line 25: add "This manuscript is organized as follows" before "in section2 "

Ans.) Following sentences were revised in p.3/1.22–26 of revised manuscript:

“The remainder of this paper is organized as follows. In section 2, improvements in the GOCI YAER V2 algorithm are summarized and a quantitative comparison with other satellite AODs is presented. In Section 3, the GOCI YAER V2 AOD is validated using ground-based sun-photometer observations along with other satellite AOD measurements. In Section 4, GOCI YAER V2 AOD errors are analyzed in relation to various parameters and expected errors are estimated. Finally, a summary and conclusions are presented in Section 5.”

42 - Line 29: Delete "qualitative" since many quantitative values are used in this section 6

43 Ans.) The word was removed in revised manuscript.

44

45 - Line 31: Please add description of the differences between All QA and QA of 3.

46 Ans.) Following sentences were revised/added in p.6/1.4–14 and p.8/1.20–22 of revised  
47 manuscript:

48 “The quality assurance (QA) value of the V1 algorithm was determined based on the range of  
49 retrieved AOD and the remaining number of pixels in a 12-pixel × 12-pixel block after all  
50 masking procedures were performed. A QA value of 0, 1, 2, or 3 for the V1 AOD was  
51 assigned for 6, 15, 22, or 36 remaining pixels, respectively. In addition, retrieved AOD values  
52 between –0.05 and 3.6 were assigned a QA value of 1, 2, or 3, and retrieved AOD values  
53 between –0.1 and –0.05 or between 3.6 and 5.0 were assigned a QA value of 0. The lower of  
54 these two QA values for each pixel was used as the final QA value.”

55 “To evaluate the new masking techniques and climatological data used in the V2 algorithm, a  
56 retrieved dataset of GOCI YAER V2 AOD for 5 May 2015 is compared with that of the V1  
57 algorithm under two scenarios: using all the quality assured (all QA; QA = 0, 1, 2, or 3)  
58 pixels and using only the highest quality assured (QA = 3) pixels.”
