# Supplementary material for: GOCI Yonsei aerosol retrieval version 2 aerosol products: improved algorithm description and error analysis with uncertainty estimation from 5-year validation over East Asia
Source: Copernicus journal article supplement (doi:10.5194/amt-2017-251), 2017-08-07
Supplement: Supplementary file [file amt-2017-251-AC5-supplement.pdf]

1 Referee: #3

2 We appreciate the reviewer's detail comments/suggestions based on insights, which helped  
3 improve the scientific quality of our manuscript. Basically, we reflected all the comments and  
4 suggestions. And, new references were added in revised manuscript.

5

6 1. General comments

7 The paper describes an improved algorithm version for the multi-spectral AOD retrieval from  
8 geostationary GOCI observations over East Asia. With its capability of monitoring hourly  
9 AOD comparable to MODIS (two-time daily) observations the new version algorithm  
10 provides important temporal resolution and good coverage in particular for air quality  
11 applications and thus covers a highly relevant topic for AMT. The quality of the new dataset  
12 is thoroughly analysed with a 5-year dataset and significant improvements (accuracy,  
13 coverage) are documented. A specific strength of the paper is its discussion and definition of  
14 a parameterized uncertainty function, which is of particular importance for data assimilation  
15 of the datasets. The algorithm improvements benefit from experiences with algorithms for  
16 similar multi-spectral radiometers onboard polar platforms (MODIS and VIIRS), which are  
17 correctly cited and suitably adapted to the GOCI sensor. Several images and some aspects of  
18 discussions should be improved (see further comments). I therefore recommend a minor  
19 revision.

20

21 2. Further comments

22 - The paper needs a thorough native speaker English correction, since there are quite a lot of

23 cases where the article (“the”) is miss-used or other in-correct sentence structures occur.

24 Ans.) In the revised manuscript, English was corrected again by native speaker.

25

26 - The paper introduces aerosol properties AE, FMF, SSA as side variables, but does not  
27 discuss the information content of the measured “spectra” and the value of those properties as  
28 output – this discussion should be added (while not overstating the weak information content  
29 for those, in particular SSA) – without proper discussion the output of those properties must  
30 be named as simple diagnostics (output not validated) or removed.

31 Ans.1) Following sentences were added/revised in p.4/l.17–27 of revised manuscript:

32 All eight channels are used over ocean surfaces, and different combinations of channels are  
33 used over land, depending on surface conditions. Measured spectral TOA reflectance can be  
34 converted to spectral AOD for all aerosol models using the pre-calculated LUT, and spectral  
35 AOD can be converted to the corresponding value at 550 nm using the assumed AE of each  
36 aerosol model. Then, the mean value and standard deviation (“*Stddev*”) of AOD at 550 nm  
37 from different channels are calculated for each aerosol model, and the three aerosol models  
38 with the lowest *Stddev* are selected. The *Stddev*-weighted average of mean AOD at 550 nm  
39 from the three selected aerosol models is used as the AOD at 550 nm. An identical *Stddev*-  
40 weighted average is applied to the assumed AE, FMF, and SSA of the selected aerosol models  
41 to determine the final AE, FMF, and SSA values. This inversion method is focused primarily  
42 on the retrieval of AOD at 550 nm from multi-channel spectral information, and the AE, FMF,  
43 and SSA are determined from aerosol models selected for the best AOD fit. Thus, AOD at  
44 550 nm is the main retrieval product, and the AE, FMF, and SSA are considered as diagnostic

45 parameters, or ancillary products.

46 In addition, following FMF, and SSA validation results and analyses were added in  
47 p.12/1.28–p.13/1.26 with Figure 5 of revised manuscript:

48 The FMF inter-comparisons between AERONET inversion data and GOCI YAER V2 are  
49 similar to those of AE, as shown in Figure 5c and d. This comparison also includes only  
50 AERONET AOD > 0.3 data. AERONET inversion products are retrieved from almucantar  
51 measurements, which are possible when the solar zenith angle is greater than 50° (Dubovik  
52 and King, 2000); thus, the number of points used in the comparison are fewer than the AOD  
53 and AE from direct measurements. The correlation coefficients of FMF over ocean and land  
54 surfaces are similar to those of AE, as both parameters are determined primarily by aerosol  
55 size.

56 The SSA inter-comparisons between AERONET and GOCI YAER V2 have the lowest R  
57 (0.206 for land and 0.251 for ocean) among the products. The visible–NIR wavelength range  
58 is more sensitive to aerosol size than absorptivity. Thus, aerosol models are constructed more  
59 coarsely for SSA than for FMF, and the inversion methods focus on spectral matching of  
60 AOD at 550 nm, rather than on SSA-optimized retrieval, such as the OMI aerosol retrieval  
61 algorithm using ultraviolet radiation (Torres et al., 2013; Jeong et al., 2016). Nevertheless, the  
62 ratio of GOCI V2 SSA to AERONET SSA in a  $\pm 0.03$  and  $\pm 0.05$  range is 47.7% and 68.0%  
63 for land and 69.7% and 88.3% for ocean, respectively, which is comparable to the OMI SSA  
64 presented by Jethva et al. (2014).

65 In conclusion, GOCI YAER V2 AE, FMF, and SSA compared with AERONET products are  
66 more biased and have lower correlation coefficients than seen for AOD. This indicates that  
67 the aerosol type selection is biased to coarse and non-absorbing aerosols. To improve the

68 accuracy of these parameters, more accurate surface reflectance estimations and improved  
 69 inversion methods are required.

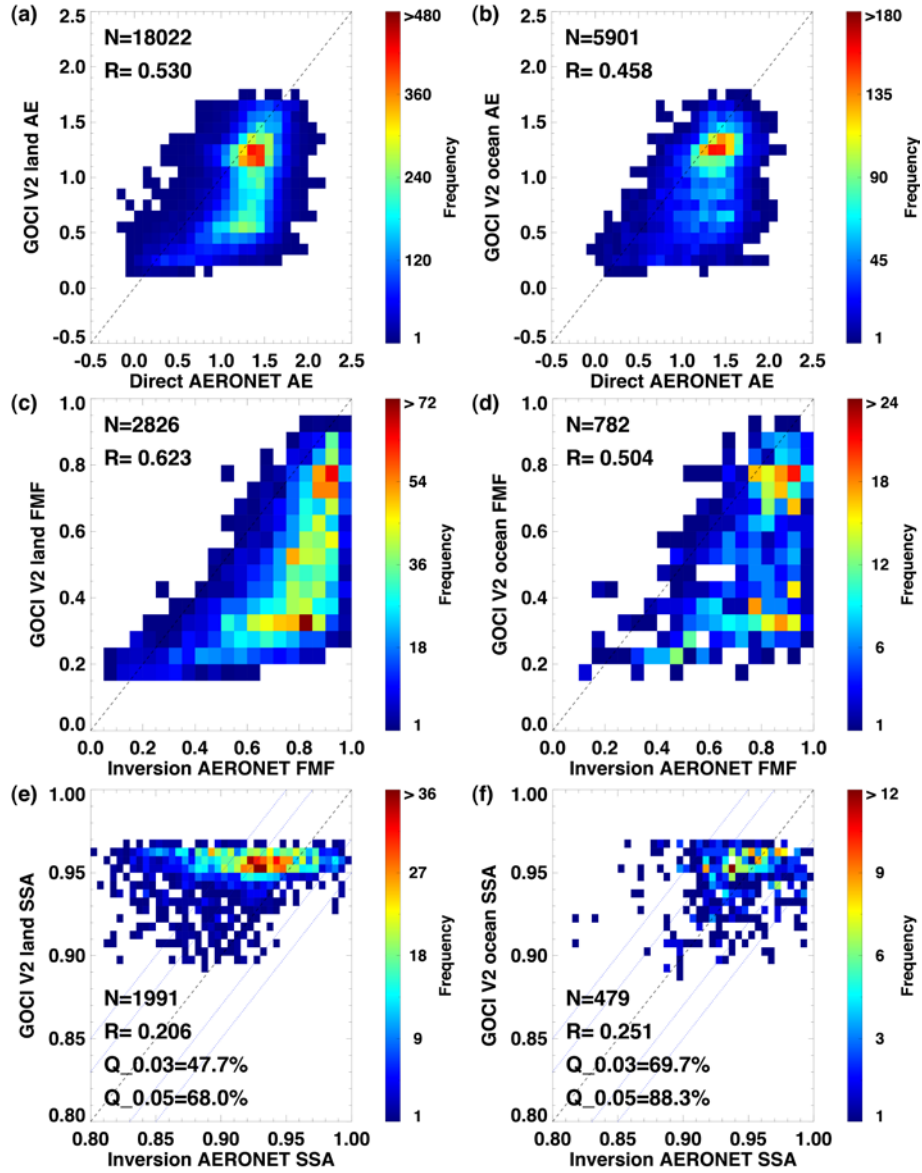

70  
 71 **Figure 4 Comparison between AERONET and GOCI YAER V2 (a) land AE, (b) ocean AE, (c) land FMF,**  
 72 **(d) ocean FMF, (e) land SSA, and (f) ocean SSA. Note that collocated data are only for AERONET AOD**  
 73 **> 0.3 for the AE and FMF comparisons, and AERONET AOD > 0.4 for the SSA comparison. Each**  
 74 **colored pixel represents a bin size of 0.10 for AE, 0.05 for FMF, and 0.005 for SSA. Black dashed lines**  
 75 **denote the one-to-one line, and blue dotted lines in the SSA comparison denote the  $\pm 0.03$  and  $\pm 0.05$**   
 76 **ranges.**

77

78

79 - In the conclusion the paper refers back to air quality applications, but misses to strongly  
80 state the importance of this retrieval with all its relevant positive aspects (hourly resolution,  
81 NRT capability, predicted uncertainties, thus well suited for data assimilation and regional air  
82 quality monitoring applications) – I recommend to strengthen this discussion in the  
83 conclusion before the outlook.

84 *Ans.) Following sentences were added in the conclusion before outlook of revised manuscript*  
85 *(p.19/1.17-21):*

86 *Aerosol retrieval using GOCI is unique because of hourly monitoring of aerosols with multi-*  
87 *channel measurements in the visible to near-infrared range with high spatial resolution, over*  
88 *East Asia where aerosol emissions are very high, despite its limitation in observation area*  
89 *coverage. Hourly GOCI AOD retrievals with high accuracy, NRT availability, and*  
90 *quantitatively analyzed uncertainties are highly suitable for use with air-quality monitoring*  
91 *and data assimilation in air-quality forecasting models, particularly when rapid diurnal*  
92 *variations and transboundary transport are significant.*

93

94 - Table 2 values of mean bias (MB) have too many significant digits, which should be  
95 reduced to a realistic level of detail within AERONET accuracy (e.g. 2 or 3 digits maximum);  
96 e.g. a value  $3.22E-05$  is exactly zero. I suggest that several figures can be improved to help  
97 better reading and avoid miss-interpretation.

98 *Ans.) Table 2 values of mean bias were revised as 3 digits in revised manuscript. Figures are*  
99 *also revised for better reading.*

100

101 - In fig. 2 I recommend to remove the linear fit (solid lines), which is not appropriate for  
102 AOD distributions.

103 [Ans.\) Linear fit lines were removed in Figure 2 of revised manuscript.](#)

104

105 - I suggest to reduce the y-axis range of figures 7, 8, and 9 to [-0.2, 0.2], so that the main  
106 information (average lines) becomes clearer (I think we can compromise on a small part of  
107 the 16th / 84th percentile).

108 [Ans.\) Figures were revised as following reviewer's comments.](#)

109

110 - The same applies for fig. 10, where the y-axis range would suffice up to 1.0 and the legend  
111 could be outside the plot.

112 [Ans.\) Figures were revised as following reviewer's comments.](#)

113

114 - In section 4.1.5 I get confused how the fraction of pixels analysed after cloud masking is  
115 interpreted as cloud fraction.

116 [Ans.\) Revised sentences were in p.15/1.21–28 of revised manuscript:](#)

117 [First, the cloud fraction \(CF\) for one  \$6 \text{ km} \times 6 \text{ km}\$  aerosol-product pixel can be calculated](#)  
118 [using the number of  \$0.5 \text{ km} \times 0.5 \text{ km}\$  L1B pixels that remain after all masking steps. In the](#)  
119 [aggregation step from the original L1B resolution of  \$0.5 \text{ km} \times 0.5 \text{ km}\$  to Level 2 aerosol-](#)  
120 [product resolution of  \$6 \text{ km} \times 6 \text{ km}\$ , the maximum number of remaining pixels is 58 after](#)  
121 [performing all the individual masking processes and discarding the darkest 20% and brightest](#)

122 40% of pixels in a block of 12 pixels  $\times$  12 pixels (i.e., 144 pixels). The minimum number is  
123 set as 29, which corresponds to 50% of the maximum value. If the number of remaining  
124 pixels is less than 29, then AOPs of that pixel are not retrieved. Note that pixels that are  
125 bright because of surface reflectance, not clouds, may be counted as high CF, but it is difficult  
126 to completely distinguish these two cases at 500-m spatial resolution.

127

128 - What does it mean that 3 plots with 3 different proxies for cloud cover in fig. 8 show  
129 different dependencies of the AOD error?

130 Ans.) The high cloud contamination in both each product-pixel (6 km  $\times$  6 km) and  
131 neighboring pixel (within 25 km) domains results in high positive biases of up to 0.1.  
132 However, an independent analysis of the cloud-contamination-only effect is complicated by  
133 various factors including surface reflectance errors resulting in high bias under low cloud-  
134 contamination conditions. Detail revised analyses were in p.15/l.17–p.16/l.22 of revised  
135 manuscript.

136

137 - In section 3 it would be of high interest to split off the analysis of coastal sites from the one  
138 over land and present a separate analysis for coastal areas.

139 Ans.) Following sentences were added in p.11/l.18–23 of revised manuscript:

140 The GOCI V2 land AOD results can be re-categorized as coastal or inland according to  
141 whether each site is collocated with both GOCI ocean and land AOD or with GOCI land  
142 AOD only. Mean AERONET AODs from coastal sites are lower (0.28) than those from  
143 inland sites (0.42). The inter-comparison between coastal-site AERONET AOD and GOCI

144 V2 land AOD has an R of 0.83, RMSE of 0.144, MB of – 0.004, and f within EE\_MDT of  
145 0.60. Results from inland sites have higher R (0.93), RMSE (0.171), MB (0.023), and the  
146 same f within EE\_MDT (0.60). High AOD is detected more frequently at inland sites than at  
147 coastal sites.

148

149 3. Detailed comments

150 - p.2 / l. 7: this sentence needs rewording, since surface does not belong to aerosol properties

151 Ans.) A following sentence was revised in p.2/l.6–8 of revised manuscript:

152 Two aerosol optical properties (AOPs), the aerosol optical depth and single scattering albedo,  
153 determine the sign and magnitude of the shortwave aerosol radiative forcing of the  
154 atmosphere for different surface conditions (Takemura et al., 2002)

155

156 - p. 2 / l. 11: define PM when it is first used introduction: I recommend to shorten the  
157 discussion of air quality, since it is too detailed for this paper where it is only relevant as  
158 application domain, but not further discussed

159 Ans.) The PM is defined as “ambient fine particulate matter”, and added in p.2/l.9–10 of  
160 revised manuscript. Discussions of air quality were also shortened.

161

162 - p. 2/ l. 32: I suggest to reword accuracy to agreement – an established satellite dataset is  
163 used as reference, which is valuable inter-comparison, but not validation (this would require a  
164 ground-based reference measurement)



165 Ans.) The word of ‘accuracy’ was revised as ‘agreement’, and in p.2/1.29 of revised  
166 manuscript.

167

168 - p.4 / l. 4-7 would benefit from a bit more detail on the unified aerosol model as in fig. 1 (e.g.  
169 how many types) `

170 Ans.) Following sentences were added/revised in p.4/l.3–9 of revised manuscript:

171 Unified aerosol models over land and ocean surfaces classify aerosols using AOD at 550 nm,  
172 FMF at 550 nm, and SSA at 440 nm derived from the global Aerosol Robotic Network  
173 (AERONET) Inversion database (Dubovik and King, 2000; Holben et al., 1998). This aerosol  
174 type classification (Lee et al., 2012) covers a range of AOPs: FMF from 0.1 to 1.0 at an  
175 interval of 0.1, and SSA from 0.85 to 1.00 at an interval of 0.05. A total of 26 aerosol models  
176 are assumed in the algorithm: 9 highly absorbing, 9 moderately absorbing, and 8 non-  
177 absorbing models. Note that AOPs to calculate AOD are constructed to account for  
178 hygroscopic growth and aggregation (Eck et al., 2003; Reid et al., 1998). Non-spherical  
179 properties are considered using the phase function derived from AERONET data.

180

181 - p. 4 / l. 16 / 17 would benefit from more explanation as in fig. 1 (how average least  
182 difference models to obtain AE, FMF, SSA

183 Ans.) It was answered together with previous comments of “the paper introduces aerosol  
184 properties AE, FMF, SSA as side variables, but does not discuss the information content of  
185 the measured “spectra” and the value of those properties as output – this discussion should be  
186 added (while not overstating the weak information content for those, in particular SSA) –

187 without proper discussion the output of those properties must be named as simple diagnostics  
188 (output not validated) or removed.” The revised sentences to this comment were in  
189 p.4/1.17–27 of revised manuscript.

190

191

192 - p. 4 / 1. 27 for more detail better refer to “next sub sections” rather than “thereafter”

193 Ans.) A following sentence were added/revised in p.5/1.2–3 of revised manuscript:

194 Details of the refined parts of the algorithm are introduced in the following subsections.

195

196 - p. 5 / 1. 15 provide definition / formula of the GEMI

197 Ans.) A formula of the GEMI was added and following sentences were revised/added in  
198 p.5/1.22–29 of revised manuscript:

199 To identify aerosols and clouds using a different technique, a pseudo Global Environment  
200 Monitoring Index (GEMI), developed by Pinty and Verstraete (1992) and Kopp et al. (2014)  
201 and applied in the operational VIIRS cloud-mask algorithm (Godin, 2014), is adopted (Step 6  
202 in Table 1). The GEMI is based on the reflectance ratio between 865 and 660 nm, and is  
203 defined as follows:

$$204 \quad GEMI = G * (1.0 - 0.25 * G) - \frac{100 * Ref_{660} - 0.125}{1.0 - 100 * Ref_{660}},$$

205 where

$$206 \quad G = \frac{200 * (Ref_{865} - Ref_{660}) + 150 * Ref_{865} + 50 * Ref_{660}}{100 * Ref_{865} + 100 * Ref_{660} + 0.50}.$$

207 Note that  $Ref_{660}$  and  $Ref_{865}$  are the TOA reflectance at 660 and 865 nm, respectively.

208

209 - p. 5 / l. 20-30 motivate why you use  $AOD_{max}=3.6$ ; briefly discuss the use of negative AOD

210 Ans.) Following sentences were added/revised in p.6/l.10–14 of revised manuscript:

211 In addition, only pixels with retrieved AOD between  $-0.05$  and  $3.6$  are included in the  
212 calculations. Small negative AOD values can be caused by surface reflectance errors in this  
213 algorithm. These are assumed to fall within the range of expected retrieval errors and are  
214 statistically significant under low-AOD conditions when compared with results from the  
215 MODIS DT algorithm (Levy et al., 2007, 2013). The threshold of maximum AOD of  $3.6$  is  
216 based on Lee et al. (2012), which considered the probability distribution of AOD in the  
217 region.

218

219 - p. 5 / l. 20-25 why do you use 1%-3%; also discuss the possible impact on algorithm  
220 outcome with a 5-year climatology in case of a major land use change during that period

221 Ans.) Following sentences were added/revised in p7/l.4–12 of revised manuscript:

222 The darkest samples (the lowest 0–1% of the aggregate sample) are assumed to be cloud  
223 shadow and the brightest samples (3%–100% of the aggregate sample) are assumed to be  
224 affected by aerosols and/or clouds. Thus, the darkest 1%–3% of the RCR samples are  
225 averaged and used to determine surface reflectance, as in the V1 algorithm. According to Hsu  
226 et al. (2004), surface reflectance can be obtained by finding the minimum RCR for each  
227 month, which corresponds to ~3% of the aggregate sample. The darkest 0–1% of pixels are  
228 assumed, based on empirical grounds, to be cloud shadow and are thus excluded. This  
229 composite procedure is implemented for each month, hour, and channel. Monthly surface

230 reflectance climatological data correspond to the middle of each month (day 15) and are  
231 linearly-interpolated to the retrieval date. Major year-to-year land use changes over the 5-year  
232 period would result in an artificial AOD bias, and should be addressed in future work.

233

234 - p. 10 / l. 1 reword “whole” to “all”

235 Ans.) The word was corrected in p.10/l.26 of revised manuscript.

236

237 - p. 10 / l. 3 reference to numbered section

238 Ans.) It was corrected in p.10/l.27 of revised manuscript.

239

240 - p. 10 / l. 5: remove “of”

241 Ans.) A following sentence was revised in p.10/l.29–30 of revised manuscript:

242 Results of a comparison between AERONET/SONET AOD and GOCI-retrieved AOD over  
243 land and ocean surfaces are presented in Figure 3.

244

245 - p. 11 / l. 4 an increase of the correlation from 0.88 to 0.89 is absolutely insignificant and  
246 thus meaningless! One should avoid such over-interpretation

247 Ans.) A following sentence was revised in p.12/l.3–5 of revised manuscript:

248 The refinement of the ocean algorithm from V1 to V2 results in improvement in most  
249 statistical parameters: decreased  $MB$  from 0.043 to 0.008, increased  $f$  within  $EE_{MDT}$  from 0.62

250 to 0.71, and decreased *RMSE* from 0.13 to 0.11.

251

252 - p. 10 / l. 16f and p. 11 / l. 7ff “counterpart” should be reworded

253 Ans.) Following sentences were revised in p.11/l.10–12 and p.12/l.6–9 of revised manuscript:

254 The *R* of 0.91 is similar to that of  $\tau_{G\_V1QA3}$  (0.92). The *N* between  $\tau_A$  and  $\tau_{G\_V2}$  is about  
255 14 times greater than the corresponding  $\tau_{MDT}$  and  $\tau_{MDB}$ , mostly because of the hourly data  
256 available from GOCI compared with the twice-daily overpass data from MODIS.

257 The *N* between AERONET and GOCI V2 AOD over ocean surfaces is about 27 times greater  
258 than that for MODIS DT AOD, which is greater than that seen in the land comparison despite  
259 the same difference in observation frequency.

260 - p. 11 / sec. 3.6 – what does “mode near 0.11 (0.10-0.12)” mean section 3.6 the ocean mode  
261 looks not identical in the plot, but in the text you give identical numbers – please provide  
262 calculated values of modes

263 Ans.) A following sentence was revised in p.12/l.14–15 of revised manuscript:

264 In Figure 4, mean relative frequency histograms for land  $\tau_A$ , collocated with GOCI and  
265 MODIS land AOD, have a mode of 0.11 (i.e. highest frequency in the range 0.105–0.115) and  
266 right-skewed distribution.

267 - p. 12 / l. 1 correct wrong wording “per each”

268 Ans.) The section 3.7 (‘fitting residuals change in inversion procedure’) including that wrong  
269 word of original manuscript was removed as the reviewer’s comment.

270

271 - p. 12 / l. 1 the terms are somewhat mixed up. I think that systematic and random or one pair  
272 of terms, while bias and noise are the other pair

273 [Ans.\) A following sentence was revised in p.13/l.28–29 of revised manuscript:](#)

274 [Retrieved AOD likely has both a systematic and random error associated with various factors,](#)  
275 [including sun–earth–satellite geometry, cloud contamination, surface type, and assumed](#)  
276 [aerosol model, among others.](#)

277

278 - fig. 7 colours red and rose are hard to distinguish – please use two more distinct colours

279 [Ans.\) The colors in that figure are changed for better distinction in revised manuscript.](#)

280

281 - sec. 3.7 discussion of fig. 5 I see practically only very little change – one could therefore  
282 consider removing sec. 3.7 and fig. 5

283 [Ans.\) The section 3.7 \('fitting residuals change in inversion procedure'\) including that wrong](#)  
284 [word of original manuscript was removed as the reviewer's comment.](#)

285

286 - p. 13 / l. 18 word more cautiously: you use one specific set of non-spherical parameters  
287 (which is better than assuming spherical particles), but there are many types of non-spherical  
288 particles, which you are not taking into account – the sentence on POLDER and MISR is  
289 somewhat out of context – you seem to try to say that those are better suited for non- spherical  
290 particles, but this is self-evident by information theory

291 Ans.) Following sentences were revised/added in p.14/l.17–24 of revised manuscript:

292 This could be due to errors in the assumed aerosol optical properties of extremely large  
293 particles. Assumed aerosol models based on the global AERONET climatological database  
294 are categorized according to FMF and SSA, and the phase functions of non-spherical  
295 properties are averaged to one value for each model. In reality, various non-spherical shapes  
296 with the same FMF value may be present, and may result in higher error at low values of  
297 AERONET AE. The differences may also be due to errors in aerosol type selection during the  
298 inversion process, as suggested by the decreased accuracy of low GOCI AE. Wavelength-  
299 dependent errors in calibration or surface reflectance assumptions may also contribute to the  
300 observed differences. Further investigation is required to quantify the relative contributions of  
301 these errors.

302

303 - p. 15 / l. 13 explain / define LEO

304 Ans.) It was defined as low earth orbit (LEO) in p.16/l.25–26 in revised manuscript.

305
